# Supplementary material for: Seasonal patterns of bison diet across climate gradients in North America
Source: PubMed Central journal article supplement (PMC7994382; doi:10.1038/s41598-021-86260-9), 2021-03-25
Supplement: 41598_2021_86260_MOESM1_ESM.pdf [file 41598_2021_86260_MOESM1_ESM.pdf]

Supplementary Information for  
Seasonal patterns of bison diet across climate gradients in North  
America

Joseph M. Craine

Supplementary Table S1. 2019 monthly dietary quality metrics averaged ( $\pm$  s.e.) across all sites.

Shown are crude protein concentrations ([CP]), digestible organic matter concentrations ([DOM]), and the ratio of concentrations of DOM and CP.

| Month     | [CP] (mg g <sup>-1</sup> ) | [DOM] (mg g <sup>-1</sup> ) | [DOM]:[CP]    |
|-----------|----------------------------|-----------------------------|---------------|
| April     | 82.5 $\pm$ 5.4             | 583.0 $\pm$ 6.1             | 8.1 $\pm$ 0.5 |
| May       | 107.6 $\pm$ 4.4            | 618.1 $\pm$ 3.4             | 6.2 $\pm$ 0.3 |
| June      | 113.2 $\pm$ 3.3            | 630.2 $\pm$ 3.4             | 5.8 $\pm$ 0.2 |
| July      | 98.2 $\pm$ 4               | 612.4 $\pm$ 3.9             | 6.6 $\pm$ 0.3 |
| August    | 88.1 $\pm$ 4               | 596.8 $\pm$ 3.8             | 7.3 $\pm$ 0.3 |
| September | 80.6 $\pm$ 4.5             | 585.1 $\pm$ 4.2             | 8.1 $\pm$ 0.4 |

Supplementary Table S2. Average ( $\pm$  s.e.) contributions of different functional groups to 2019 dietary protein intake for bison across sites. Data based on the 200 most abundant Exact Sequence Variants (ESVs), which were assigned a consensus taxonomy and then a function classification. Cool-season graminoids includes C<sub>3</sub> grasses, sedges, and *Equisetum*. Warm-season grass was derived exclusively from grasses. Legumes only included species from Fabaceae.

| Month     | Cool-season<br>graminoid | Warm-season<br>grass | Legume         | Forb           | Woody         |
|-----------|--------------------------|----------------------|----------------|----------------|---------------|
| April     | 27.6 $\pm$ 4.1           | 13.3 $\pm$ 2.7       | 33.3 $\pm$ 4.8 | 22.4 $\pm$ 3.7 | 3.5 $\pm$ 1.4 |
| May       | 40.9 $\pm$ 5.0           | 10.4 $\pm$ 2.4       | 20.0 $\pm$ 4.0 | 24.6 $\pm$ 3.9 | 4.1 $\pm$ 2.1 |
| June      | 32.5 $\pm$ 4.4           | 10.3 $\pm$ 2.2       | 27.6 $\pm$ 4.5 | 27.7 $\pm$ 3.5 | 2.0 $\pm$ 0.5 |
| July      | 23.0 $\pm$ 3.7           | 10.2 $\pm$ 2.4       | 44.3 $\pm$ 4.8 | 19.6 $\pm$ 3.0 | 3.0 $\pm$ 2.0 |
| August    | 16.6 $\pm$ 2.8           | 12.3 $\pm$ 2.5       | 55.9 $\pm$ 5.3 | 14.2 $\pm$ 2.9 | 1.0 $\pm$ 0.5 |
| September | 15.8 $\pm$ 2.8           | 16.2 $\pm$ 2.9       | 45.6 $\pm$ 5.1 | 21.3 $\pm$ 3.5 | 1.0 $\pm$ 0.7 |

Supplementary Table S3. Model results for dietary quality. Intercept represents April dietary quality. The interaction represents adjustments for other months.

|           | [CP]             |        |        | [DOM]            |          |        | [DOM]:[CP]       |         |        |
|-----------|------------------|--------|--------|------------------|----------|--------|------------------|---------|--------|
|           | Estimate         | SS     | P      | Estimate         | SS       | P      | Estimate         | SS      | P      |
|           | 86.3 ± 3.68      | 242195 | <0.001 | 583 ± 4.38       | 11052230 | <0.001 | 7.88 ± 0.28      | 2019.64 | <0.001 |
| MAP       | 0.05 ± 0.02      | 4549   | 0.001  | 0.00 ± 0.02      | 14       | 0.881  | -0.0047 ± 0.0012 | 43.02   | <0.001 |
| MAT       | 2.51 ± 1.46      | 1312   | 0.086  | 2.04 ± 1.73      | 863      | 0.241  | -0.16 ± 0.11     | 5.23    | 0.157  |
| Month     |                  | 38876  | <0.001 |                  | 77061    | <0.001 |                  | 200.85  | <0.001 |
| May       | 25.38 ± 4.77     |        | <0.001 | 35.13 ± 5.67     |          | <0.001 | -1.94 ± 0.37     |         | <0.001 |
| Jun       | 31.25 ± 4.7      |        | <0.001 | 47.90 ± 5.60     |          | <0.001 | -2.32 ± 0.36     |         | <0.001 |
| Jul       | 16.09 ± 4.82     |        | <0.001 | 29.40 ± 5.74     |          | <0.001 | -1.48 ± 0.37     |         | <0.001 |
| Aug       | 6.5 ± 4.77       |        | 0.174  | 13.73 ± 5.68     |          | 0.016  | -0.79 ± 0.37     |         | 0.032  |
| Sep       | -1.97 ± 4.77     |        | 0.68   | 1.61 ± 5.68      |          | 0.778  | 0.01 ± 0.37      |         | 0.977  |
| MAP*MAT   | -0.0056 ± 0.0016 | 5628   | <0.001 | -0.0000 ± 0.0019 | 0        | 0.986  | 0.0003 ± 0.0001  | 15.58   | 0.015  |
| MAP*Month |                  | 1328   | 0.698  |                  | 2741     | 0.496  |                  | 11.36   | 0.497  |
| MAP:May   | 0.023 ± 0.021    |        | 0.26   | 0.007 ± 0.025    |          | 0.781  | 0.001 ± 0.002    |         | 0.678  |
| MAP:Jun   | 0.023 ± 0.02     |        | 0.26   | 0.033 ± 0.024    |          | 0.182  | 0.001 ± 0.002    |         | 0.577  |
| MAP:Jul   | 0.030 ± 0.021    |        | 0.149  | 0.031 ± 0.025    |          | 0.211  | 0.000 ± 0.002    |         | 0.812  |
| MAP:Aug   | 0.022 ± 0.021    |        | 0.285  | 0.032 ± 0.025    |          | 0.2    | -0.001 ± 0.002   | 0.595   |        |
| MAP:Sep   | 0.033 ± 0.021    |        | 0.115  | 0.040 ± 0.024    |          | 0.103  | -0.002 ± 0.002   |         | 0.248  |
| MAT*Month |                  | 12502  | <0.001 |                  | 11686    | 0.003  |                  | 72.74   | <0.001 |
| MAT: May  | -4.52 ± 1.83     |        | 0.014  | -2.11 ± 2.18     |          | 0.334  | 0.23 ± 0.14      |         | 0.102  |
| MAT:Jun   | -7.85 ± 1.89     |        | <0.001 | -7.55 ± 2.25     |          | <0.001 | 0.45 ± 0.14      |         | 0.002  |
| MAT:Jul   | -8.48 ± 1.97     |        | <0.001 | -6.71 ± 2.34     |          | 0.005  | 0.57 ± 0.15      |         | <0.001 |
| MAT:Aug   | -7.76 ± 1.92     |        | <0.001 | -6.09 ± 2.28     |          | 0.008  | 0.61 ± 0.15      |         | <0.001 |
| MAT: Sep  | -7.72 ± 1.90     |        | <0.001 | -6.26 ± 2.26     |          | 0.006  | 0.58 ± 0.15      |         | <0.001 |

Supplementary Table S4. Dietary quality model results as in Table 3, but including warm-season grass abundance.

|           | [CP]              |        |        | [DOM]             |         |        | [DOM]:[CP]        |         |        |
|-----------|-------------------|--------|--------|-------------------|---------|--------|-------------------|---------|--------|
|           | Estimate          | SS     | P      | Estimate          | SS      | P      | Estimate          | SS      | P      |
| Intercept | 90.33 ± 3.92      | 227699 | <0.001 | 586.4 ± 4.7       | 9595099 | <0.001 | 7.56 ± 0.3        | 1595.89 | <0.001 |
| MAP       | 0.04 ± 0.02       | 3080   | 0.008  | -0.01 ± 0.02      | 165     | 0.606  | 0 ± 0             | 31.31   | <0.001 |
| MAT       | 3.5 ± 1.48        | 2394   | 0.019  | 2.88 ± 1.78       | 1621    | 0.106  | -0.24 ± 0.11      | 10.91   | 0.038  |
| Month     |                   | 34948  | <0.001 |                   | 71736   | <0.001 |                   | 178.46  | <0.001 |
| May       | 24.65 ± 4.71      |        | <0.001 | 34.5 ± 5.65       |         | <0.001 | -1.88 ± 0.36      |         | <0.001 |
| Jun       | 30.51 ± 4.64      |        | <0.001 | 47.27 ± 5.57      |         | <0.001 | -2.26 ± 0.36      |         | <0.001 |
| Jul       | 15.31 ± 4.76      |        | 0.002  | 28.74 ± 5.71      |         | <0.001 | -1.42 ± 0.36      |         | <0.001 |
| Aug       | 6.38 ± 4.7        |        | 0.176  | 13.63 ± 5.64      |         | 0.017  | -0.78 ± 0.36      |         | 0.031  |
| Sep       | -0.96 ± 4.72      |        | 0.838  | 2.46 ± 5.66       |         | 0.664  | -0.07 ± 0.36      |         | 0.85   |
| MAP*MAT   | -0.0064 ± 0.00158 | 7006   | <0.001 | -0.00068 ± 0.0019 | 78      | 0.722  | 0.00036 ± 0.00012 | 21.71   | 0.004  |
| MAP*Month |                   | 2004   | 0.458  |                   | 3178    | 0.4    |                   | 13.2    | 0.389  |
| MAP:May   | 0.031 ± 0.021     |        | 0.14   | 0.013 ± 0.025     |         | 0.601  | 0.0001 ± 0.0016   |         | 0.949  |
| MAP:Jun   | 0.027 ± 0.02      |        | 0.185  | 0.036 ± 0.024     |         | 0.141  | 0.0006 ± 0.0015   |         | 0.71   |
| MAP:Jul   | 0.038 ± 0.021     |        | 0.067  | 0.038 ± 0.025     |         | 0.129  | -0.001 ± 0.0016   |         | 0.524  |
| MAP:Aug   | 0.026 ± 0.021     |        | 0.201  | 0.035 ± 0.025     |         | 0.154  | -0.0012 ± 0.0016  |         | 0.458  |
| MAP:Sep   | 0.04 ± 0.02       |        | 0.054  | 0.046 ± 0.025     |         | 0.061  | -0.0024 ± 0.0016  |         | 0.129  |
| MAT*Month |                   | 12603  | <0.001 |                   | 11323   | 0.003  |                   | 69.94   | <0.001 |
| MAT: May  | -5.32 ± 1.83      |        | 0.004  | -2.8 ± 2.2        |         | 0.204  | 0.29 ± 0.14       |         | 0.949  |
| MAT:Jun   | -8.19 ± 1.87      |        | <0.001 | -7.84 ± 2.24      |         | <0.001 | 0.47 ± 0.14       |         | 0.71   |
| MAT:Jul   | -8.9 ± 1.95       |        | <0.001 | -7.06 ± 2.33      |         | 0.003  | 0.6 ± 0.15        |         | 0.524  |
| MAT:Aug   | -7.91 ± 1.89      |        | <0.001 | -6.22 ± 2.27      |         | 0.007  | 0.62 ± 0.14       |         | 0.458  |
| MAT: Sep  | -7.77 ± 1.87      |        | <0.001 | -6.31 ± 2.25      |         | 0.005  | 0.58 ± 0.14       |         | 0.129  |

Supplementary Table S5. Results of model of functional group composition of bison diet. As in Table 3, the intercept represents April abundance and the interaction represents adjustments for other months.

|             | Cool-season graminoid |        |        | Warm-season grass |        |        | Legume          |        |        |
|-------------|-----------------------|--------|--------|-------------------|--------|--------|-----------------|--------|--------|
|             | Estimate              | SS     | P      | Estimate          | SS     | P      | Estimate        | SS     | P      |
| Intercept   | 27.43 ± 3.87          | 244.82 | <0.001 | 15.13 ± 2.52      | 74.54  | <0.001 | 30.18 ± 5.24    | 296.35 | <0.001 |
| MAP.c       | 0.01 ± 0.01           | 9.47   | 0.164  | -0.01 ± 0.00      | 12.36  | 0.015  | 0.02 ± 0.01     | 48.02  | 0.021  |
| MAT.c       | -3.80 ± 0.54          | 244.94 | <0.001 | 2.48 ± 0.35       | 103.95 | <0.001 | -0.24 ± 0.73    | 0.95   | 0.745  |
| Month       |                       | 0.3    | 0.803  |                   | 13.64  | 0.256  |                 | 379.18 | <0.001 |
| MonthMay    | 13.54 ± 5.01          |        | 0.007  | -2.93 ± 3.27      |        | 0.371  | -13.33 ± 6.79   |        | 0.051  |
| MonthJun    | 5.45 ± 4.94           |        | 0.271  | -2.93 ± 3.22      |        | 0.364  | -6.53 ± 6.69    |        | 0.33   |
| MonthJul    | -4.89 ± 5.07          |        | 0.336  | -2.97 ± 3.30      |        | 0.37   | 11.24 ± 6.87    |        | 0.103  |
| MonthAug    | -11.6 ± 5.01          |        | 0.022  | -0.49 ± 3.27      |        | 0.882  | 22.68 ± 6.8     |        | <0.001 |
| MonthSep    | -12.68 ± 5.01         |        | 0.012  | 3.48 ± 3.27       |        | 0.288  | 12.57 ± 6.8     |        | 0.066  |
| MAP.c:MAT.c | 0.0004 ± 0.0017       | 217.04 | <0.001 | -0.0027 ± 0.0011  | 13.3   | 0.012  | 0.0042 ± 0.0022 | 31.98  | 0.06   |
|             |                       |        |        |                   |        |        |                 |        |        |
|             | Forb                  |        |        | Woody species     |        |        |                 |        |        |
|             | Estimate              | SS     | P      | Estimate          | SS     | P      |                 |        |        |
| Intercept   | 23.33 ± 3.72          | 177.1  | <0.001 | 3.93 ± 1.54       | 5.032  | <0.001 |                 |        |        |
| MAP.c       | -0.02 ± 0.01          | 72.73  | <0.001 | 0.01 ± 0          | 4.153  | 0.021  |                 |        |        |
| MAT.c       | 1.95 ± 0.52           | 63.99  | <0.001 | -0.38 ± 0.21      | 2.466  | 0.074  |                 |        |        |
| Month       |                       | 46.28  | 0.072  |                   | 3.432  | 0.486  |                 |        |        |
| MonthMay    | 2.17 ± 4.82           |        | 0.241  | 0.54 ± 1.99       |        | 0.786  |                 |        |        |
| MonthJun    | 5.58 ± 4.75           |        | 0.56   | -1.57 ± 1.96      |        | 0.424  |                 |        |        |
| MonthJul    | -2.85 ± 4.88          |        | 0.093  | -0.54 ± 2.01      |        | 0.789  |                 |        |        |
| MonthAug    | -8.13 ± 4.82          |        | <0.001 | -2.48 ± 1.99      |        | 0.215  |                 |        |        |
| MonthSep    | -0.84 ± 4.82          |        | 0.653  | -2.52 ± 1.99      |        | 0.206  |                 |        |        |
| MAP.c:MAT.c | -0.0014 ± 0.0016      | 3.36   | 0.862  | -0.0005 ± 0.0007  | 0.527  | 0.408  |                 |        |        |
